# Supplementary material for: Pulmonary embolism in COVID-19 infection: a high case-fatality related to pulmonary embolism characteristics
Source: PubMed Central journal article supplement — Eur Respir J. 2023 Jan 26;61(1):2202447. doi: 10.1183/13993003.02447-2022 (PMC9881221; doi:10.1183/13993003.02447-2022), 2023-01-26

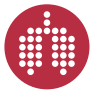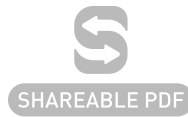

# Pulmonary embolism in COVID-19 infection: a high case-fatality related to pulmonary embolism characteristics

Francis Couturaud<sup>1,2</sup>, Cécile Tromeur<sup>1,2</sup> and Raphael Le Mao<sup>1,2</sup>

<sup>1</sup>INSERM U1304-GETBO, Univ. Brest, FCRIN INNOVTE, Brest, France. <sup>2</sup>Département de Médecine Interne et Pneumologie, Centre Hospitalo-Universitaire de Brest, Brest, France.

Corresponding author: Francis Couturaud ([francis.couturaud@chu-brest.fr](mailto:francis.couturaud@chu-brest.fr))

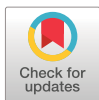

Shareable abstract (@ERSpublications)

**Pulmonary embolism (PE) in COVID-19 patients is associated with poorer outcomes than in non-COVID-19 patients with PE, and in COVID-19 patients without PE, emphasising the need for dedicated adequate thromboprophylactic and diagnostic strategies** <https://bit.ly/3QrQy7t>

**Cite this article as:** Couturaud F, Tromeur C, Le Mao R. Pulmonary embolism in COVID-19 infection: a high case-fatality related to pulmonary embolism characteristics. *Eur Respir J* 2023; 61: 2202447 [DOI: 10.1183/13993003.02447-2022].

This single-page version can be shared freely online.

Copyright ©The authors 2023.

This version is distributed under the terms of the Creative Commons Attribution Non-Commercial Licence 4.0. For commercial reproduction rights and permissions contact [permissions@ersnet.org](mailto:permissions@ersnet.org)

Received: 20 Dec 2022  
Accepted: 23 Dec 2022

The devastating outbreak of 2019 novel coronavirus disease (COVID-19) has markedly weakened healthcare systems throughout the world [1, 2]. Severe acute respiratory syndrome coronavirus 2 (SARS-CoV-2) infection was the first recognised main clinical presentation, which is associated with severe lung parenchymal damage, and this syndrome appeared to be the main cause of disease severity and mortality [1]. However, a few months after the pandemic started, evidence indicated that COVID-19 infection was associated with an increased risk of venous thromboembolism (VTE), and particularly pulmonary embolism (PE) and *in situ* pulmonary thrombosis [3].

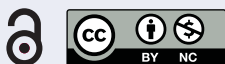

Supplement: ERJ-02447-2022.Shareable.pdf [file ERJ-02447-2022.Shareable.pdf]
